# Supplementary material
Source: publisher site journal article supplement (https://www.dovepress.com/article/supplementary_file/555134/555134%20Revised%20Supplementary%20Material.docx)
Supplement: Supplementary file 1 [file 555134%20Revised%20Supplementary%20Material.docx]

**Supplementary Table S1**: Change-score models with and without outliers influence sensitivity

| Outcome (Δ) | Specification | N | β (Rotational - Day) | 95% CI | p |
| --- | --- | --- | --- | --- | --- |
| ΔTST (min) | Including outliers | 15 | -58.62 | [-138.99, 21.75] | 0.1391 |
| ΔTST (min) | Outlier-excluded (primary) | 14 | -52.84 | [-138.76, 33.07] | 0.205 |
| ΔTST (min) | Influence-excluded (sensitivity) | 13 | -77.61 | [-151.03, -4.19] | 0.0401 |
| Δ Sleep Efficiency (%) | Including outliers | 15 | 3.44 | [-11.05, 17.93] | 0.6168 |
| Δ Sleep Efficiency (%) | Outlier-excluded (primary) | 13 | 2.78 | [-14.87, 20.44] | 0.7349 |
| Δ Sleep Efficiency (%) | Influence-excluded (sensitivity) | 11 | 1.46 | [-5.0, 7.92] | 0.6217 |
| Δ Sleep Disturbance (T-score) | Including outliers | 39 | -1.98 | [-5.25, 1.28] | 0.2256 |
| Δ Sleep Disturbance (T-score) | Outlier-excluded (primary) | 38 | -2.19 | [-5.58, 1.19] | 0.1975 |
| Δ Sleep Disturbance (T-score) | Influence-excluded (sensitivity) | 36 | -2.59 | [-5.57, 0.39] | 0.0867 |

**Supplementary Table S2**. Sample sizes for Figure 3 panels by shift group

| **Figure 3 Panel** | **Bivariate correlations** | **Regular (n)** | **Rotating (n)** | **Total (n)** |
| --- | --- | --- | --- | --- |
| A | Δ PROMIS Sleep Disturbance T-score **~** Δ Cortisol | 7 | 7 | 14 |
| B | Δ PROMIS Sleep Impairment T-score **~** Δ Cortisol | 7 | 7 | 14 |
| C | Δ PROMIS Sleep Disturbance T-score **~**  Δ Cortisol:DHEA-S ratio | 7 | 7 | 14 |
| D | Δ PROMIS Sleep Impairment T-score **~** Δ Cortisol:DHEA-S ratio | 7 | 7 | 14 |
| E | Δ SWDI Total Raw Score **~** Δ α-Amylase | 7 | 7 | 14 |
| F | Δ PROMIS Sleep Impairment T-score **~** Δ PROMIS Sleep Disturbance T-score | 25 | 13 | 38 |

**Note:** Counts reflect complete cases per panel. Panels A–E use the biomarker subsample (limited by saliva availability); Panel F uses all participants with paired PROMIS scales.

“~” denotes the correlation between 2 variables.

Δ (two-timepoint change scores: Follow-up − Baseline).

**Supplementary Table S3** Benjamini-Hochberg False Discovery Rate (FDR) Correction for Multiple Comparisons Across Primary Sleep and Biomarker Analyses

| **Relationship/Test** | **Raw p-value** | **FDR-adjusted p-value** | **Significant (FDR)** |
| --- | --- | --- | --- |
| PROMIS Sleep Disturbance (ANOVA) | 0.0154 | 0.0330 | TRUE |
| PROMIS Sleep Impairment (ANOVA) | 0.0198 | 0.03713 | TRUE |
| SWDI (ANOVA) | 0.0001 | 0.0015 | TRUE |
| TST (ANOVA) | 0.05 | 0.0500 | TRUE |
| Sleep Efficiency (ANOVA) | 0.0414 | 0.04777 | TRUE |
| Cortisol → PROMIS Disturbance (Correlation) | 0.0113 | 0.0305 | TRUE |
| Cortisol → PROMIS Impairment (Correlation) | 0.0251 | 0.0377 | TRUE |
| C/D Ratio → PROMIS Disturbance (Correlation) | 0.0292 | 0.0398 | TRUE |
| C/D Ratio → PROMIS Impairment (Correlation) | 0.0122 | 0.0305 | TRUE |
| Alpha-Amylase → SWDI (Correlation) | 0.05 | 0.0500 | TRUE |
| PROMIS Sleep Disturbance → PROMIS Impairment (Correlation) | 0.0224 | 0.03733 | TRUE |
| PROMIS Sleep Disturbance → Cortisol (Multivariable) | 0.0005 | 0.0038 | TRUE |
| PROMIS Sleep Disturbance → DHEA-S (Multivariable) | 0.0035 | 0.0175 | TRUE |
| PROMIS Sleep Impairment → Cortisol (Multivariable) | 0.0064 | 0.0240 | TRUE |
| PROMIS Sleep Impairment → DHEA-S (Multivariable) | 0.0405 | 0.04777 | TRUE |

**SWDI** = Shift Work Disorder Index; **ANOVA** = analysis of variance; **TST** = Total sleep time; **C/D ratio** = Cortisol-to–DHEA-S ratio; **DHEA-S** = Dehydroepiandrosterone sulfate; **PROMIS** = Patient-Reported Outcomes Measurement Information System. **FDR** = false discovery rate.

All tests are two-tailed. FDR-adjusted *p* values were computed using the Benjamini–Hochberg procedure across the tests shown; “Significant (FDR)” indicates FDR-adjusted *p* ≤ 0.05.

**Supplementary Table S4:** Baseline demographics by shift group

| Sex | Regular | Rotating |
| --- | --- | --- |
| Male, n | 13 | 8 |
| Female, n | 23 | 8 |
| Age (Years) (Mean ± SD) |  |  |
| Male | 32.08 ± 8.96 | 37.38 ± 10.39 |
| Female | 29.65 ± 9.34 | 29.13 ± 7.88 |
| Overall Age (Years) (Mean ± SD) | 30.53 ± 9.15 | 33.25 ± 9.88 |

*Footnote:* Two-sample *t* tests: men *p*=0.25; women *p*=0.89; overall *p*=0.34 (all **ns**).

Supplementary Table S4 expands baseline demographics by sex within shift group; no statistically significant differences were observed.
